# Supplementary material
Source: PubMed Central journal article supplement (PMC4340316)
Supplement: supp_M054510_jlr.M054510-1.pdf [file supp_M054510_jlr.M054510-1.pdf]

**Supplemental Table 1.**

**Clinical Parameters of HIV-infected patients**

|                                          | <b>HIV-infected patients<br/>(n = 231)</b> |
|------------------------------------------|--------------------------------------------|
| CD4+ cell count (cells/mm <sup>3</sup> ) | 438 ± 265                                  |
| CD4+ cells (%)                           | 24.4 ± 11.2                                |
| Log Viral load (copy/ml)                 | 4.3 ± 0.8                                  |
| IL-6 levels (pg/ml)                      | 4.9 ± 8.3                                  |

Values are mean ± SD.

**Supplemental Table 2. Clinical and biological characteristics of HIV-infected patients according to their CD4+ T-cell counts.**

|                                             | <b>&lt;200 cells/mm<sup>3</sup></b><br><b>(n=41)</b> | <b>201-350 cells/mm<sup>3</sup></b><br><b>(n=45)</b> | <b>351-500 cells/mm<sup>3</sup></b><br><b>(n=63)</b> | <b>&gt; 500 cells/mm<sup>3</sup></b><br><b>(n=82)</b> |
|---------------------------------------------|------------------------------------------------------|------------------------------------------------------|------------------------------------------------------|-------------------------------------------------------|
| CD4+ cell count<br>(cells/mm <sup>3</sup> ) | 93.5±62.8***                                         | 280.6±44.1***                                        | 414.9±43.6***                                        | 717.2±204.9                                           |
| CD4+ cells (%)                              | 8.9±6.1***                                           | 20.8±6.8***                                          | 25.9±7.5***                                          | 33.2±8.0                                              |
| Log Viral Load<br>(copy/ml)                 | 4.9±0.8***                                           | 4.3±0.7***                                           | 4.4±0.7**                                            | 3.9±0.8                                               |
| IL6 (pg/ml)                                 | 7.3±8.2**                                            | 3.3±3.1                                              | 5.6±12.8                                             | 3.8±5.4                                               |
| Age (y)                                     | 40.5±10.3**                                          | 36.6±9.7                                             | 38.4±9.8*                                            | 35.0±7.9                                              |
| BMI (kg/m <sup>2</sup> )                    | 22.6±3.1                                             | 23.9±4.3                                             | 24.2±3.8                                             | 23.3±4.3                                              |
| CETP activity (%)                           | 29.6±9.1                                             | 26.1±7.5                                             | 27.7±6.8                                             | 27.3±6.9                                              |
| TC (mg/dl)                                  | 161.9±45.0*                                          | 166.1±40.6*                                          | 172.7±36.3                                           | 182.7±44.8                                            |
| TG (mg/dl)                                  | 138.4±87.5**                                         | 112.6±81.8                                           | 90.0±44.4                                            | 93.7±52.6                                             |
| HDLC (mg/dl)                                | 39.9±14.2                                            | 45.7±17.8                                            | 43.4±12.7                                            | 46.4±11.4                                             |
| LDLC (mg/dl)                                | 96.3±37.7**                                          | 97.3±32.1**                                          | 111.6±31.7                                           | 117.4±37.0                                            |
| APOB (mg/dl)                                | 76.0±23.9**                                          | 77.9±23.1                                            | 83.9±24.5                                            | 85.2±23.7                                             |
| APOA1 (mg/dl)                               | 101.8±25.7**                                         | 110.4±30.5                                           | 104.8±18.2*                                          | 113.0±20.5                                            |

BMI: Body Mass Index; TC: Total Cholesterol; TG: Triglycerides; LDLC: low density lipoprotein cholesterol; HDLC: high density lipoprotein cholesterol. No significant difference in plasma CETP activity was observed in each CD4+ subgroups (<200 CD4+/mm<sup>3</sup> or 201-350 CD4+/mm<sup>3</sup> or 351-500 CD4+/mm<sup>3</sup>) as compared to the highest CD4+ count subgroup (>500 CD4+/mm<sup>3</sup>) in unadjusted analysis or following adjustment for plasma lipids levels, BMI, sex and age.

Values are mean ± SD. \*\*\*p<0.0001, \*\*p<0.007 and \*p<0.04 versus subgroup of HIV-infected patients displaying the highest circulating levels of CD4+ (>500 cells/mm<sup>3</sup>).

**Supplemental Table 3:**

**Pearson's correlation and partial correlation coefficients with CD4+ cell count in HIV-infected patients**

| <b>Parameters</b>    | <b>r unadjusted</b> | <b><i>p value</i></b> | <b>r adjusted for age</b> | <b><i>p value</i></b> |
|----------------------|---------------------|-----------------------|---------------------------|-----------------------|
| <b>Age</b>           | 0.05                | <i>0.47</i>           | -                         | -                     |
| <b>IL-6</b>          | -0.08               | <i>0.31</i>           | -0.19                     | <i>0.02</i>           |
| <b>BMI</b>           | -0.12               | <i>0.06</i>           | 0.02                      | <i>0.72</i>           |
| <b>CETP activity</b> | -0.06               | <i>0.37</i>           | 0.02                      | <i>0.79</i>           |
| <b>TC</b>            | 0.17                | <i>0.007</i>          | 0.24                      | <i>0.0002</i>         |
| <b>logTG</b>         | -0.39               | <i>0.55</i>           | -0.11                     | <i>0.09</i>           |
| <b>HDL-C</b>         | 0.13                | <i>0.04</i>           | 0.15                      | <i>0.02</i>           |
| <b>LDL-C</b>         | 0.20                | <i>0.0017</i>         | 0.26                      | <i>&lt;0.0001</i>     |
| <b>ApoB</b>          | 0.11                | <i>0.08</i>           | 0.17                      | <i>0.009</i>          |
| <b>ApoAI</b>         | 0.12                | <i>0.05</i>           | 0.16                      | <i>0.01</i>           |

**Supplemental Table 4.** Percentage Weight Chemical Composition of HDL Subfractions isolated from HIV-uninfected controls, HIV-infected patients before and after HAART

|       | Patient group  | FC (%)    | PL (%)     | P (%)      | TG (%)              | CE (%)             | CE/TG         | FC+PL/<br>CE+TG |
|-------|----------------|-----------|------------|------------|---------------------|--------------------|---------------|-----------------|
| HDL2b | HIV-Uninfected | 5.6± 1.2  | 22.7 ± 1.3 | 40.6 ± 3.3 | 5.5 ± 0.7           | 25.5± 1.9          | 4.6           | 0.9             |
|       | HIV-Infected   | 5.2 ± 0.6 | 21.2 ± 1.5 | 41.5 ± 3.7 | <b>7.6 ± 0.8***</b> | 24.4 ± 3.8         | <b>3.2***</b> | 0.8             |
|       | HIV-Treated    | 5.0 ± 0.2 | 21.2 ± 0.7 | 43.1 ± 3.1 | <b>6.4 ± 0.7‡</b>   | 24.3 ± 1.1         | <b>3.8**</b>  | 0.9             |
| HDL2a | HIV-Uninfected | 4.0 ± 1.6 | 21.8 ± 1.4 | 44.6 ± 3.0 | 4.7 ± 0.6           | 24.9 ± 2.2         | 5.3           | 0.9             |
|       | HIV-Infected   | 3.4 ± 0.3 | 20.9 ± 1.5 | 45.0 ± 2.8 | <b>6.2 ± 0.5***</b> | 24.6 ± 2.6         | <b>4.0**</b>  | 0.8             |
|       | HIV-Treated    | 3.0 ± 0.3 | 20.6 ± 1.5 | 46.7 ± 2.6 | 5.6 ± 0.7           | 24.1 ± 1.8         | 4.3           | 0.8             |
| HDL3a | HIV-Uninfected | 2.5 ± 0.7 | 19.7 ± 2.4 | 51.9 ± 4.9 | 4.5 ± 0.5           | 21.4 ± 3.0         | 4.8           | 0.9             |
|       | HIV-Infected   | 2.7 ± 0.2 | 19.1 ± 0.4 | 50.4 ± 3.0 | <b>5.7 ± 0.6***</b> | 22.1 ± 2.8         | <b>3.9*</b>   | 0.8             |
|       | HIV-Treated    | 2.5 ± 0.2 | 18.4 ± 0.4 | 54.5 ± 2.0 | 5.3 ± 0.5           | 19.3 ± 2.2         | 3.6           | 0.8             |
| HDL3b | HIV-Uninfected | 1.9 ± 0.4 | 16.1 ± 2.8 | 63.1 ± 6.7 | 5.0 ± 1.0           | 13.9 ± 3.3         | 2.8           | 1.0             |
|       | HIV-Infected   | 2.2 ± 0.3 | 17.2 ± 0.7 | 59.7 ± 2.7 | <b>6.0 ± 0.9*</b>   | 15.0 ± 3.3         | 2.5           | 0.9             |
|       | HIV-Treated    | 2.4 ± 0.3 | 17.0 ± 0.7 | 63.8 ± 2.8 | 5.9 ± 0.9           | <b>11.0 ± 3.3‡</b> | <b>1.9*</b>   | 1.1             |
| HDL3c | HIV-Uninfected | 2.6 ± 1.1 | 15.4 ± 2.2 | 72.8 ± 4.0 | 5.6 ± 1.1           | 5.6 ± 2.7          | 1.0           | 1.6             |
|       | HIV-Infected   | 2.5 ± 0.9 | 15.5 ± 1.3 | 69.5 ± 1.8 | 6.2 ± 1.1           | 6.3 ± 2.5          | 1.0           | 1.4             |
|       | HIV-Treated    | 2.6 ± 0.9 | 14.9 ± 1.8 | 74.0 ± 3.1 | 5.4 ± 1.1           | <b>3.2 ± 1.5‡</b>  | 0.6           | 2.0             |

\* $P < 0.05$ , \*\* $P < 0.005$  versus control, \*\*\* $P < 0.0005$  versus HIV-uninfected patients. ‡ $p < 0.05$  and ‡‡ $p < 0.005$  versus HIV-infected patients before treatment.

### Supplemental Table 5

Percentage Weight Chemical Composition of apoB containing Subfractions isolated from HIV-uninfected controls, HIV-infected patients before and after HAART

|       | Patient group  | FC (%)              | PL (%)               | P (%)      | TG (%)               | CE (%)               | CE/TG         | FC+PL/<br>CE+TG |
|-------|----------------|---------------------|----------------------|------------|----------------------|----------------------|---------------|-----------------|
| VLDL  | HIV-Uninfected | 10.5±1.4            | 14.5 ± 1.7           | 15.6 ± 2.8 | 27.3 ± 7.0           | 32.1 ± 3.2           | 1.2           | 0.4             |
|       | HIV-Infected   | 9.0 ± 3.4           | <b>12.2 ± 2.2*</b>   | 15.0 ± 3.2 | 33.2 ± 8.5           | 30.6 ± 4.1           | 0.9           | 0.3             |
|       | HIV-Treated    | 9.4 ± 0.9           | 13.5 ± 1.0           | 15.9 ± 0.8 | 27.9 ± 3.1           | 33.3 ± 4.4           | 1.2           | 0.4             |
| IDL   | HIV-Uninfected | 9.3 ± 0.9           | 16.7 ± 3.9           | 17.9 ± 4.2 | 24.7 ± 7.8           | 31.5 ± 3.9           | 1.3           | 0.5             |
|       | HIV-Infected   | <b>8.5 ± 0.8*</b>   | 15.5 ± 2.6           | 17.2 ± 1.8 | 27.9 ± 1.9           | 30.9 ± 2.9           | 1.1           | 0.4             |
|       | HIV-Treated    | 8.0 ± 0.6*          | 15.9 ± 3.0           | 18.6 ± 2.3 | 25.5 ± 3.7           | 32.1 ± 6.2           | 1.3           | 0.4             |
| LDL-1 | HIV-Uninfected | 10.1 ± 0.7          | 16.3 ± 0.9           | 21.3 ± 3.5 | 12.7 ± 3.2           | 39.5 ± 3.3           | 3.1           | 0.5             |
|       | HIV-Infected   | <b>8.9± 0.7***</b>  | <b>18.4 ± 1.5***</b> | 20.5± 2.2  | <b>18.1 ± 2.5***</b> | <b>34.0 ± 3.6***</b> | <b>1.9***</b> | 0.5             |
|       | HIV-Treated    | <b>8.6 ± 0.5**</b>  | 17.2 ± 1.6           | 21.7 ± 0.7 | <b>14.1 ± 1.5‡</b>   | <b>38.4 ± 3.1‡‡</b>  | <b>2.7‡</b>   | 0.5             |
| LDL-2 | HIV-Uninfected | 10.3 ± 0.6          | 14.6 ± 0.5           | 19.9 ± 2.0 | 8.3 ± 1.5            | 46.8 ± 1.4           | 5.6           | 0.5             |
|       | HIV-Infected   | <b>9.3± 0.5***</b>  | <b>15.3 ± 0.6**</b>  | 21.2 ± 1.9 | <b>12.9 ± 1.7***</b> | <b>41.4 ± 2.8***</b> | <b>3.2**</b>  | 0.5             |
|       | HIV-Treated    | <b>9.0 ± 1.0**</b>  | <b>14.6 ± 0.5‡</b>   | 21.2 ± 0.9 | <b>9.8 ± 0.9‡‡</b>   | <b>45.4 ± 1.6‡</b>   | <b>4.6*,‡</b> | 0.4             |
| LDL-3 | HIV-Uninfected | 10.1 ± 0.8          | 14.7 ± 0.4           | 20.8 ± 2.7 | 7.4 ± 0.9            | 47.0 ± 2.3           | 6.4           | 0.5             |
|       | HIV-Infected   | <b>9.3 ± 0.6*</b>   | <b>14.3± 0.5*</b>    | 21.2 ± 1.9 | <b>9.2 ± 0.9***</b>  | 46.0 ± 1.7           | 5.0           | <b>0.4***</b>   |
|       | HIV-Treated    | <b>8.4 ± 1.2**</b>  | 14.5 ± 0.5           | 22.0 ± 2.0 | <b>8.6 ± 0.6‡</b>    | 46.5 ± 0.8           | <b>5.4*</b>   | 0.4*            |
| LDL-4 | HIV-Uninfected | 9.2 ± 0.9           | 15.8 ± 1.1           | 25.5 ± 3.0 | 8.6 ± 1.2            | 41.0 ± 3.8           | 4.8           | 0.5             |
|       | HIV-Infected   | 8.6 ± 0.7           | <b>14.8 ± 1.0*</b>   | 24.5 ± 2.1 | 9.4 ± 1.8            | <b>42.7 ± 3.7</b>    | 4.5           | <b>0.4**</b>    |
|       | HIV-Treated    | <b>7.6 ± 1.0*,‡</b> | <b>16.1 ± 0.3‡</b>   | 27.2 ± 2.4 | 9.8 ± 0.9            | 39.3 ± 2.0           | 4.0           | 0.5             |
| LDL-5 | HIV-Uninfected | 7.7± 1.0            | 20.0 ± 1.9           | 30.0 ± 4.0 | 7.9 ± 0.8            | 34.0 ± 4.1           | 4.3           | 0.7             |
|       | HIV-Infected   | 7.8 ± 0.7           | 18.2 ± 2.4           | 30.8 ± 2.6 | <b>10.1± 1.4***</b>  | <b>33.2 ± 4.5**</b>  | <b>3.3**</b>  | 0.6             |
|       | HIV-Treated    | <b>6.9 ± 0.4*,‡</b> | 20.6 ± 0.7           | 28.1 ± 3.0 | 9.2 ± 0.8*           | 35.2 ± 2.5           | 3.8           | 0.6             |

FC: free cholesterol; PL: phospholipids, P: total protein, TG: triglycerides, CE: Cholesteryl esters. Values are mean ± SD.

\*p < 0.05, \*\*p < 0.005 versus control, \*\*\* p < 0.0005 versus HIV-uninfected controls. ‡p<0.05 and ‡‡p<0.005 versus HIV-infected patients before treatment.

**Supplemental Table 6:  
Impact of HAART duration on plasma cholesterol efflux capacity and major biological parameters**

| <b>Parameters</b>                        | <b><math>\beta</math></b> | <b>P Value</b> |
|------------------------------------------|---------------------------|----------------|
| <b>Plasma efflux capacity from THP-1</b> | -0.002                    | 0.24           |
| <b>Plasma efflux capacity via ABCA1</b>  | -0.0009                   | 0.48           |
| <b>Plasma efflux capacity via SR-BI</b>  | 0.002                     | 0.18           |
| <b>Plasma efflux capacity via ABCG1</b>  | -0.0008                   | 0.75           |
| <b>Endogenous plasma CETP activity</b>   | -0.001                    | 0.72           |
| <b>HDL-C</b>                             | 0.14                      | 0.18           |
| <b>LDLC</b>                              | 0.23                      | 0.44           |
| <b>TG</b>                                | -0.12                     | 0.63           |
| <b>CT</b>                                | 0.33                      | 0.32           |
| <b>apoB</b>                              | -0.0009                   | 0.55           |
| <b>apoA1</b>                             | 0.0008                    | 0.67           |
| <b>CRP</b>                               | 0.96                      | 0.86           |
| <b>IL-6</b>                              | -0.36                     | 0.04           |

## Supplemental Figure 1

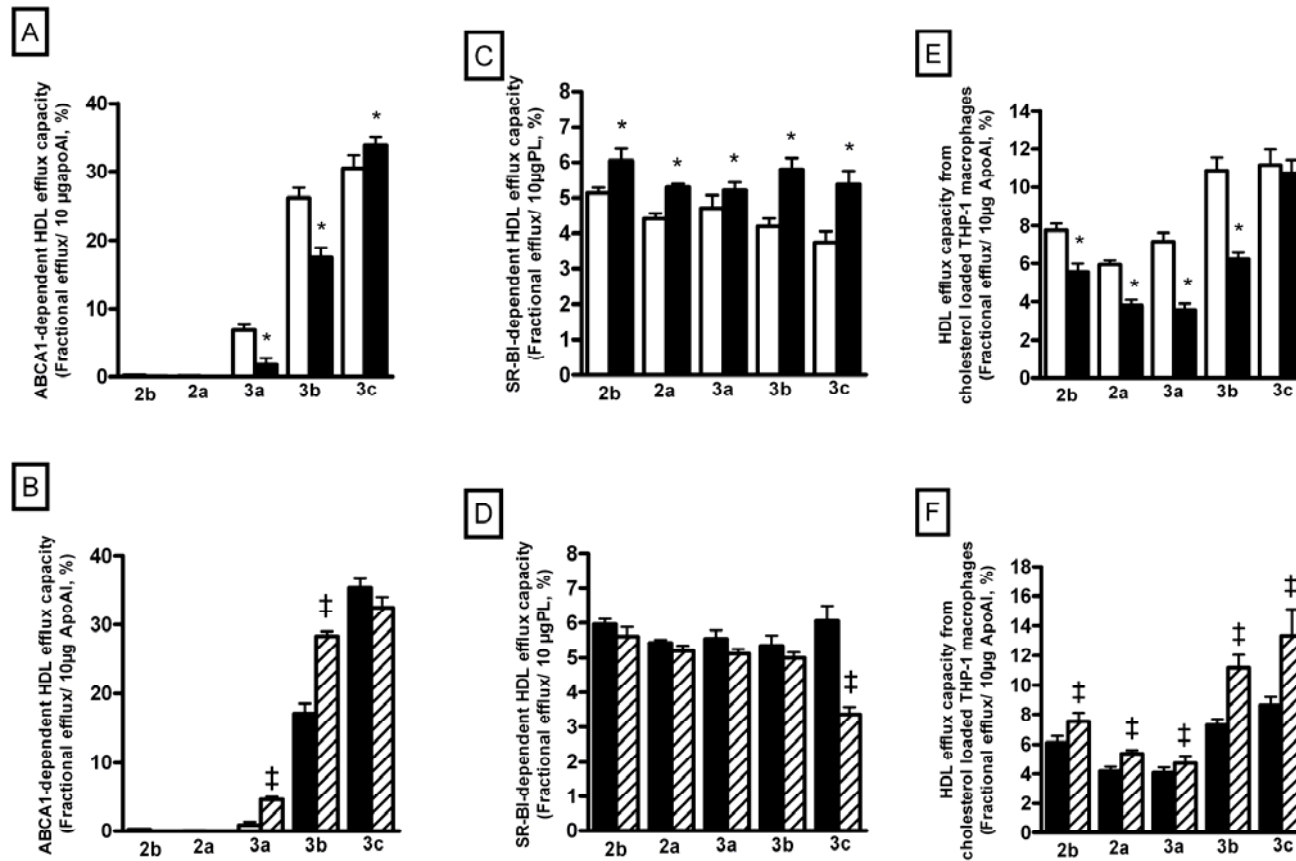

Bar graphs showing efflux capacity of isolated HDL subspecies determined in HIV-infected subjects (n=231; closed bars) and HIV-uninfected controls (n= 200; open bars) (panels A-C-E) and in a subset of HIV-infected patients before (n= 41; closed bars) and after HAART (n= 41; hatched bars) (panels B-D-F). Fractional cholesterol efflux is expressed as a function of fixed concentrations of HDL-apoAI for ABCA1-dependent efflux (panels A and B) or HDL efflux to THP-1 macrophages (panels E and F) and of HDL-PL for SR-BI-dependent efflux (panels C and D) Values are mean  $\pm$  SEM. \*P<0.05 versus controls and †p<0.05 versus HIV-infected patients before treatment.

Supplemental Figure 2

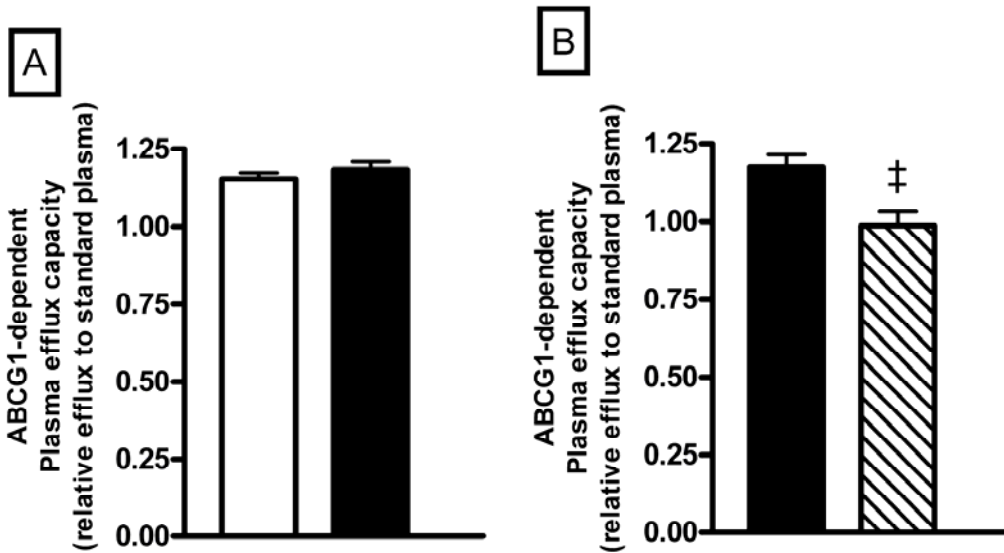

**Panel A:** Bar graphs showing plasma efflux capacities determined in HIV-infected patients (closed bars) and HIV-uninfected controls (open bars).

**Panel B:** Bar graphs showing plasma efflux capacities determined in HIV-infected subjects before (closed bars) and after HAART (hatched bars). The ABCG1-dependent efflux was calculated as the difference between cholesterol efflux to human ABCG1-transfected Chinese hamster ovary-K1 cells and cholesterol efflux to wild-type Chinese hamster ovary-K1 cells after 4 h incubation in the presence of 40-fold-diluted plasma. Values are mean  $\pm$  SEM. ‡  $p < 0.002$  versus HIV-infected patients before treatment.



### Supplemental Figure 3

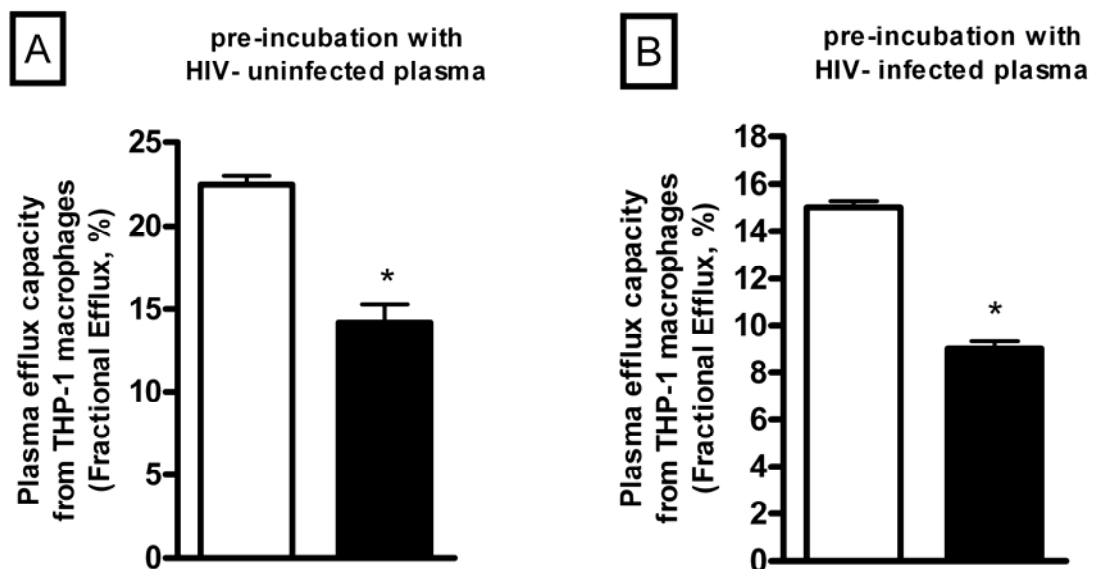

Prior to efflux experiment, human THP-1 macrophages were incubated for 24h in the presence of 10% plasma from either HIV-uninfected patients (Panel A) or HIV-infected control subjects (panel B) diluted in RPMI media. Then efflux experiments were performed during 4hours incubation in the presence of 40-fold diluted total plasma from HIV-uninfected patients (n=6; open bars) and HIV-infected patients (n=6; closed bars). Values are mean  $\pm$  SEM. Experiments were performed in triplicate and values correspond to the mean of two independent experiments. \* $p < 0.05$  versus HIV-uninfected control subjects.
